# Supplementary material for: Trajectory of self-care behaviour in patients with heart failure: the impact on clinical outcomes and influencing factors
Source: PubMed Central journal article supplement (PMC7272123; doi:10.1177/1474515120902317), 2020-01-29
Supplement: 10.1177_1474515120902317_Supplementary_Table.pdf [file 10.1177_1474515120902317_Supplementary_Table.pdf]

**Supplementary table.** Characteristics of patients classified by changes of self-care behaviour (N=167)

|                                             | Poor-Poor<br>(n=34) | Good-Poor<br>(n=46) | Poor-Good<br>(n=17) | Good-Good<br>(n=70) | P-value |
|---------------------------------------------|---------------------|---------------------|---------------------|---------------------|---------|
| <b><i>Demographics</i></b>                  |                     |                     |                     |                     |         |
| Education, n (%)                            |                     |                     |                     |                     | 0.332   |
| Basic education, 6 years                    | 11 (34%)            | 9 (20%)             | 4 (24%)             | 17 (25%)            |         |
| Education after basic school                | 18 (56%)            | 30 (68%)            | 13 (76%)            | 39 (56%)            |         |
| University or higher professional education | 3 (9.3%)            | 5 (11%)             | 0 (0%)              | 13 (19%)            |         |
| <b><i>Clinical characteristics</i></b>      |                     |                     |                     |                     |         |
| Admission in past 6 months, n (%)           | 3 (8.3%)            | 5 (11%)             | 1 (5.9%)            | 5 (7.1%)            | 0.933   |
| Heart rate (bpm)                            | 73.0±18.1           | 70.5±9.4            | 67.5±11.9           | 68.5±14.9           | 0.397   |
| NT-pro BNP (ng/L)                           |                     |                     |                     |                     |         |
| At baseline                                 | 753 (359-2124)      | 771 (330-2198)      | 1025 (203-1691)     | 1031 (440-1773)     | 0.927   |
| Follow up                                   | 551 (279-1566)      | 829 (324-2198)      | 1155 (165-1707)     | 930 (296-1796)      | 0.810   |
| Atrial fibrillation, n (%)                  | 13 (36%)            | 18 (39%)            | 5 (29%)             | 32 (46%)            | 0.577   |
| COPD, n (%)                                 | 6 (17%)             | 9 (20%)             | 1 (5.9%)            | 12 (17%)            | 0.664   |

**Abbreviations:** SD, standard deviation; COPD, chronic obstructive pulmonary disease.
